# Supplementary material for: Chromosome-Level Genome Assembly for Acer pseudosieboldianum and Highlights to Mechanisms for Leaf Color and Shape Change
Source: Front Plant Sci. 2022 Mar 3;13:850054. doi: 10.3389/fpls.2022.850054 (PMC8927880; doi:10.3389/fpls.2022.850054)
Supplement: Supplementary file 2 [file Data_Sheet_2.xlsx]

## Sheet: Table S1
Table S1 The statistics of K-mer analysis
Parameter	Size
K-mer	15
K-mer number	53543138311
K-mer Depth	94
Genome Size (bp)	558487000
Revised Genome Size (bp)	557650836
Heterozygous Ratio (%)	1.09753
Repeat (%)	80.4127

## Sheet: Table S2
Table S2 BUSCO evaluation results for Acer pseudosieboldianum genome
Term	Genes	Percentage (%)	Proteins	Percentages(%)
Complete BUSCOs	1588	98.4	1590	98.5
Complete and single-copy BUSCOs	1515	93.9	1394	86.4
Complete and duplicated BUSCOs	73	4.5	196	12.1
Fragmented BUSCOs	10	0.6	10	0.6
Missing BUSCOs	16	1	14	0.9
Total BUSCO groups searched	1614	100	1614	100

## Sheet: Table S3
Table S3 Statistics of transposable elements and other repeats in the Acer pseudosieboldianumgenome
Type	Repeat Size (bp)	% of genome
Trf	48300502	7
Repeatmasker	16952999	2.46
Proteinmask	77076931	11.16
De novo	516087742	74.76
Total	530503700	76.84

## Sheet: Table S4
Table S4 Repeat sequence classification results statistics in the Acer pseudosieboldianum genome
	RepeatMasker TEs	%	RepeatProteinMask TEs	%	De novo	%	Combined TEs	%
Type	Length (Bp)	0	Length (Bp)	0	Length (Bp)	0	Length (Bp)	0
DNA	10295843	1.49	48471	0.01	90780305	13.15	96964100	14.05
LINE	363975	0.05	3928667	0.57	51147549	7.41	52222042	7.56
SINE	2622	0	0	0	578489	0.08	581050	0.08
LTR	11577626	1.68	73100644	10.59	387723019	56.16	397284964	57.55
Other	0	0	0	0	0	0	0	0
Unknown	23730	0	0	0	31898645	4.62	31921302	4.62
Total TE	16847399	2.44	77076931	11.16	510079385	73.88	519175593	75.2

## Sheet: Table S5
Table S5 Repeat elements in the Acer pseudosieboldianum
subtype	length(bp)	number
DNA/Academ-1	261	4
DNA/CMC-Chapaev	152	2
DNA/CMC-EnSpm	21500773	120086
DNA/CMC-Transib	52873	154
DNA/Crypton-A	84	1
DNA/Crypton-H	161	2
DNA/Crypton-V	323516	1512
DNA/DNA	7892291	40375
DNA/Dada	1207159	6959
DNA/Ginger-1	338812	2194
DNA/Helitron	9799181	34544
DNA/IS3EU	7262972	47293
DNA/Kolobok-T2	1294644	7015
DNA/MULE-MuDR	18031672	41563
DNA/MULE-NOF	3266	47
DNA/Maverick	4017655	23637
DNA/Merlin	1208493	6875
DNA/P	1616084	8812
DNA/PIF-Harbing	1589	9
DNA/PIF-Harbinger	5070937	24362
DNA/PIF-ISL2EU	3999	70
DNA/PiggyBac	219868	1611
DNA/TcMar	13025	196
DNA/TcMar-Fot1	50	1
DNA/TcMar-ISRm11	310198	2074
DNA/TcMar-Mariner	1341	24
DNA/TcMar-Pogo	198132	852
DNA/TcMar-Tc1	634166	2327
DNA/TcMar-Tc2	169	3
DNA/TcMar-Tc4	1332	18
DNA/TcMar-Tigger	707	8
DNA/Zisupton	261217	1302
DNA/hAT	556055	4272
DNA/hAT-Ac	13249232	50091
DNA/hAT-Blackjack	103	2
DNA/hAT-Charlie	6299469	20071
DNA/hAT-Tag1	2749341	7855
DNA/hAT-Tip100	6164688	28265
DNA/hAT-hAT19	169686	781
DNA/hAT-hAT5	102	2
DNA/hAT-hAT6	71	1
DNA/hAT-hobo	343	6
LINE/CR1	620	10
LINE/Dong-R4	96	2
LINE/I	19073	53
LINE/I-Jockey	1865	28
LINE/L1	48986333	144182
LINE/L1-Tx1	2380817	9811
LINE/L2	3397	63
LINE/Penelope	501354	2128
LINE/R1	807	12
LINE/R1-LOA	70	1
LINE/R2	3190	58
LINE/RTE-BovB	278194	1477
LINE/RTE-RTE	75	2
LINE/RTE-X	374795	1295
LINE/Rex-Babar	57712	177
LTR/Caulimoviru	376616	324
LTR/Caulimovirus	3106694	6664
LTR/Copia	154672142	278206
LTR/DIRS	370	7
LTR/ERV-Foamy	174	2
LTR/ERV1	5580507	42506
LTR/ERVK	2101984	11077
LTR/ERVL	29832	191
LTR/ERVL-MaLR	369	5
LTR/Gypsy	130179606	190961
LTR/Helitron-2	171719	643
LTR/LTR	127173560	376296
LTR/Ngaro	6408526	33187
LTR/Pao	657390	3335
Retroposon/Retroposon	209	3
Retroposon/SVA	93	1
SINE/Alu	321	4
SINE/B2	119	2
SINE/ID	684	11
SINE/MIR	121	2
SINE/SINE	578489	2726
SINE/tRNA-Core-RTE	122	2
SINE/tRNA-Deu-RTE	168	2
SINE/tRNA-RTE	995	13
SINE/tRNA-V	12	1
SINE/tRNA-V-CR1	80	1
Satellite/Satellite	2859760	12356
Simple_repeat/Simple_repeat	3245154	564
Unknown/Helitron-2	2789	12
Unknown/Unknown	31918513	126610

## Sheet: Table S6
Table S6 Statistical results of genetic structure of related species
Gene set		Number	Average gene length (bp)	Average CDS length (bp)	Average exon per gene	Average exon length (bp)	Average intron length (bp)
De novo	AUGUSTUS	27233	4714.04	1142.14	5.06	225.53	878.87
	GlimmerHMM	28465	2119.83	880.73	3.98	221.5	416.32
Homolog	Acer truncatum	55341	3337.5	864.42	3.03	284.92	1215.95
	Acer yangbiense	48667	5402.5	867.49	3.36	258.14	1921.22
	Citrus sinensis	43805	5953.04	976.55	3.52	277.76	1978.11
	Pistacia vera	42411	4465.51	890.72	3.4	261.95	1489.26
	Xanthoceras sorbifolium	44014	4588.83	917.99	3.52	261.08	1458.95
trans.orf/Isoseq		11769	4376.16	1270.49	6.16	298.52	492.23
BUSCO		1690	5615.18	1694.74	9.65	175.7	453.46
MAKER		29775	3739.01	1171.24	4.92	276.22	608.23
Total		29679	3817.09	1179.31	5.59	283.76	596.47

## Sheet: Table S7
Table S7 Non-coding genes in the Acer pseudosieboldianum genome
Main type	Type	Numbers	Average length(bp)	Total length(bp)	% of genome
miRNA	miRNA	82	127.8	10480	0.0015
tRNA	tRNA	1014	74.48	75526	0.0109
rRNA	rRNA	1515	179.85	272469	0.0395
	18S	49	1737.35	85130	0.0123
	28S	91	200.23	18221	0.0026
	5.8S	48	171.56	8235	0.0012
	5S	1327	121.24	160883	0.0233
	8S	0	0	0	0
snRNA	snRNA	297	124.2	36886	0.0053
	CD-box	125	104.82	13102	0.0019
	HACA-box	17	127.12	2161	0.0003
	splicing	155	139.5	21623	0.0031
	scaRNA	0	0	0	0

## Sheet: Table S8
Table S8 Summary of the functional annotation in Acer pseudosieboldianum genome
Annotation database	Number	Percent(%)
InterPro	22819	76.89
GO	16141	54.39
KEGG_ALL	27376	92.24
KEGG_KO	10176	34.29
Swissprot	20440	68.87
TrEMBL	27413	92.36
NR	27451	92.49
Annotated	27531	92.76
Unannotated	2148	7.24
Total	29679	100

## Sheet: Table S9
Table S9 Summary of gene ortholog analysis conducted on 16 sequenced genomes
Species	Sigle-copy orthologs	Multipe-copy orthologs	Unique paralogs	Other orthologs	Unclustered genes
A. pseudosieboldianum	2056	5004	1656	16870	4093
O. sativa	2221	3891	3060	8496	6543
A. yangbiense	2149	4907	1054	15730	4015
A. truncatum	2022	4564	848	15188	5509
X. sorbifolium	2001	5176	234	14931	1023
D. longan	2053	5877	7552	18483	5317
P. vera	1700	6828	1469	17763	3002
S. birrea	2382	3356	393	10235	2571
P. dulcis	2658	2008	881	6658	2563
A. thaliana	1882	5479	2793	13131	4013
V. vinifera	2125	5292	1412	14065	1972
C. sinensis	2188	4782	214	15287	1572
C. unshiu	2180	4628	1064	13817	4686
C. clementina	2214	4571	79	14817	806
P. avium	2036	5155	968	14123	2085

## Sheet: Table S10
Table S10 Comparison of the estimated number of gene families of Acer pseudosieboldianum with other plants
Species	Total genes	Families	Unique Families	Single copy	Ave. genes per family
A. pseudosieboldianum	29679	16229	415	560	1.58
O. sativa	24211	10503	883	560	1.68
A. yangbiense	27855	15252	363	560	1.56
A. truncatum	28131	15513	357	560	1.46
X. sorbifolium	23365	14800	101	560	1.51
D. longan	39282	15577	979	560	2.18
P. vera	30762	14784	488	560	1.88
S. birrea	18937	12231	156	560	1.34
P. dulcis	14768	8552	202	560	1.43
A. thaliana	27298	12982	750	560	1.79
V. vinifera	24866	13876	345	560	1.65
C. sinensis	24043	15541	89	560	1.45
C. unshiu	26375	14964	326	560	1.45
C. clementina	22487	15217	35	560	1.43
P. avium	24367	14261	317	560	1.56

[truncated: 13 more sheets: Table S11, Table S12, Table S13, Table S14, Table S15, Table S16, Table S17, Table S18, Table S19, Table S20, Table S21, Table S22, Table S23]
